# Supplementary material for: Evaluation of dynamic changes in interstitial fluid proteome following microdialysis probe insertion trauma in trapezius muscle of healthy women
Source: PubMed Central journal article supplement (PMC5339898; doi:10.1038/srep43512), 2017-03-07
Supplement: srep43512-s1.pdf [file srep43512-s1.pdf]

**Evaluation of dynamic changes in interstitial fluid proteome following microdialysis in trapezius muscle of healthy women**

**Maria V. Turkina<sup>1</sup>, Nazdar Ghafouri<sup>2</sup>, Björn Gerdle<sup>2</sup>, Bijar Ghafouri<sup>2</sup>**

<sup>1</sup> Division of Cell Biology, Department of Clinical and Experimental Medicine, Linköping University, Sweden

<sup>2</sup> Pain and Rehabilitation Centre, and Department of Medical and Health Sciences, Linköping University, Linköping, Sweden

**Supplementary information**

Supplementary S1. Report for proteins identified in microdialysis samples by Scaffold with at least 2 peptides. Protein clusters are expanded and GO annotations are shown.

Supplementary S2. Report for proteins with mass under 25kDa identified in microdialysis samples by Scaffold with at least 1 peptide. Protein clusters are expanded and GO annotations are shown.
